# Supplementary material for: Protein Content and Amino Acid Profiles of Selected Edible Insect Species from the Democratic Republic of Congo Relevant for Transboundary Trade across Africa
Source: MDPI journal article supplement (doi:10.3390/insects13110994), 2022-10-29
Supplement: s1 [file s1]

## SUPPLEMENTARY MATERIAL

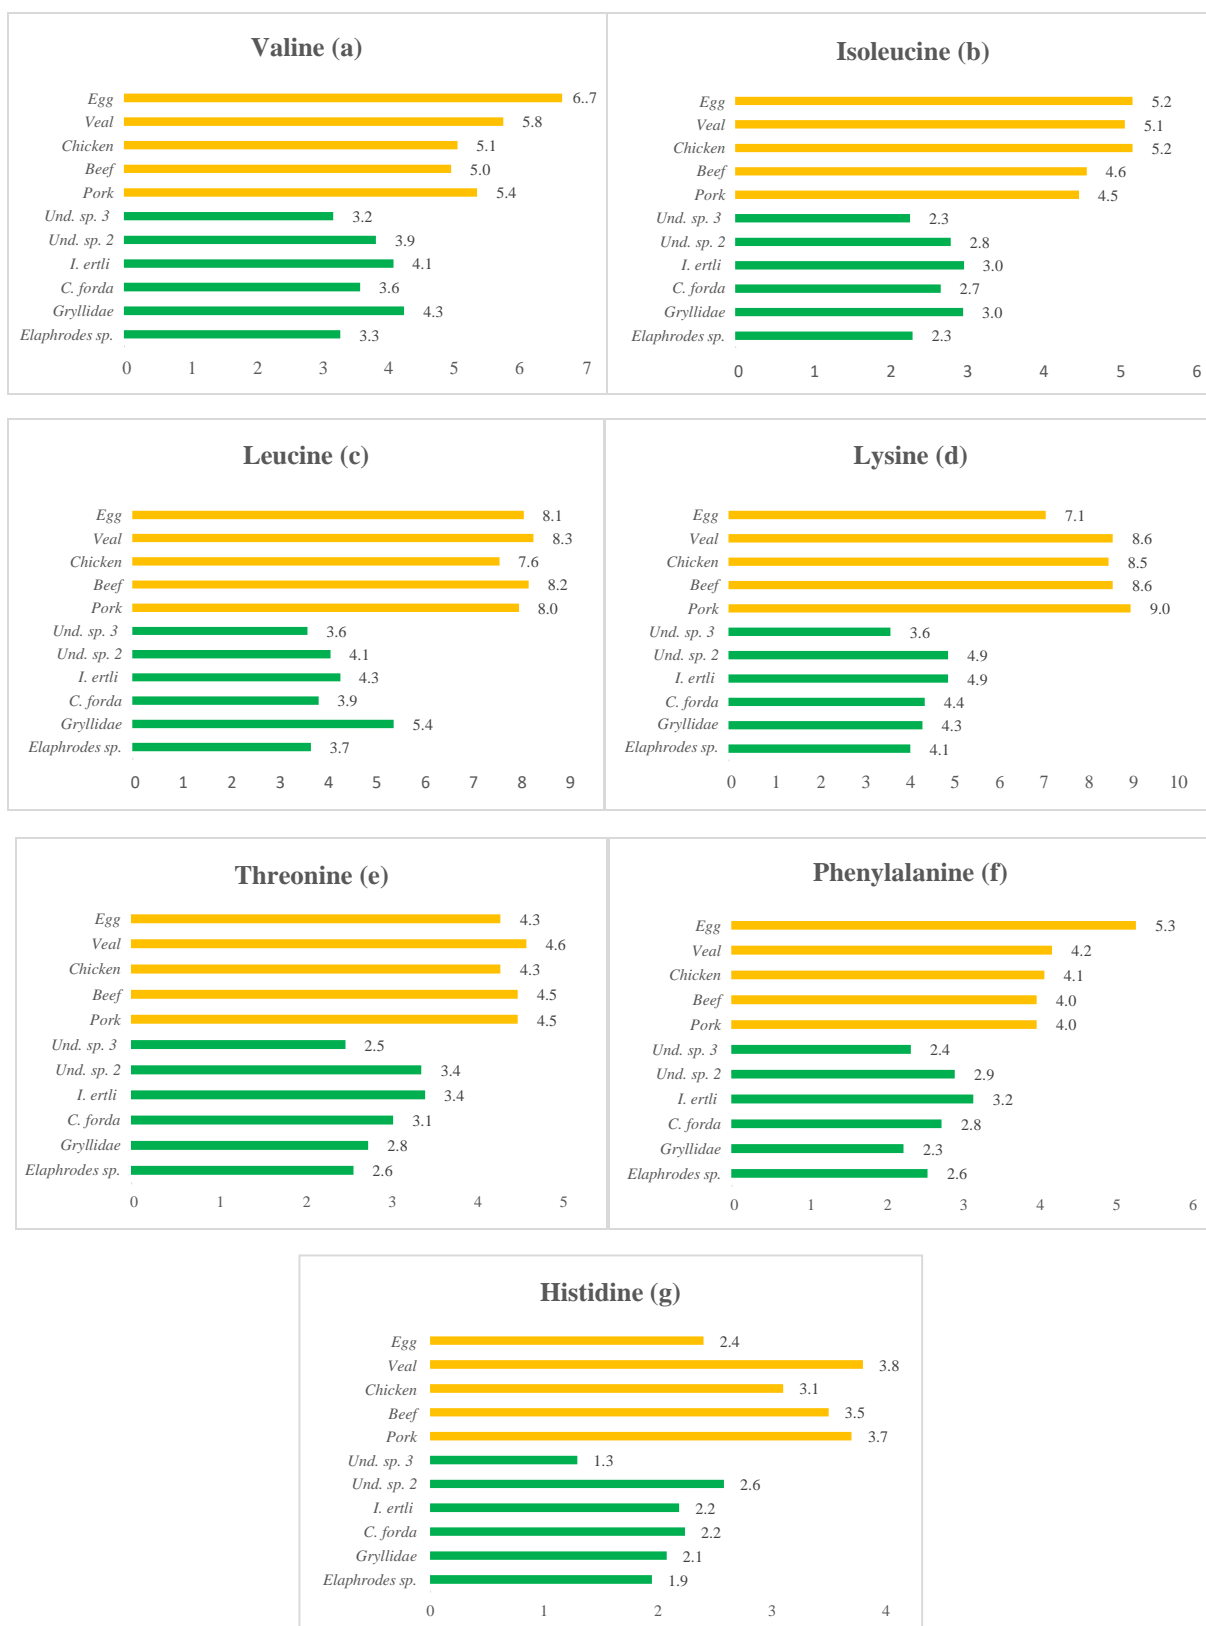

**Figure S1 (a – g).** Selected AA distribution's comparison in the protein fraction (% of total AA) of sampled insects with common sources of animal-based proteins - data other than insects are from Ghosh et al. [66].
