# Supplementary material for: Protein Content and Amino Acid Profiles of Selected Edible Insect Species from the Democratic Republic of Congo Relevant for Transboundary Trade across Africa
Source: MDPI journal article supplement (doi:10.3390/insects13110994), 2022-10-29
Supplement: s1 [file s1]

## SUPPLEMENTARY MATERIALS

**Table S1.** EAA profiles (g/100 g dry matter) of selected edible insects derived from literature

| Edible insect species                              | His   | Ile   | Leu    | Lys   | Met + Cys | Phe + Tyr | Thr   | Trp   | Sources |
|----------------------------------------------------|-------|-------|--------|-------|-----------|-----------|-------|-------|---------|
| <b>Lepidoptera</b>                                 |       |       |        |       |           |           |       |       |         |
| <u>Saturniidae</u>                                 |       |       |        |       |           |           |       |       |         |
| <i>Cirina forda</i> Westwood, 1849                 | 2,080 | 3,680 | 5,910  | 4,590 | 1,280     | 8,450     | 5,190 | 1,840 | [42]    |
| <i>Samia ricini</i> Jones, W., 1791 (pupae)        | 2,670 | 4,420 | 6,630  | 6,540 | 2,840     | 14,640    | 4,750 | N/A   | [10,60] |
| <i>Nudaurelia oyemensis</i> Rougeot, 1955          | 1,810 | 2,560 | 8,270  | 7,980 | 4,320     | 13,430    | 4,450 | 1,600 | [10,61] |
| <i>Imbrasia truncata</i> Aurivillius, 1909         | 1,740 | 2,420 | 7,310  | 7,890 | 3,870     | 13,870    | 4,690 | 1,650 | [10,61] |
| <i>Imbrasia ertli</i> Rebel, 1904                  | N/A   | 3,600 | 3,670  | 3,930 | 2,920     | 3,060     | 4,050 | 0,810 | [10,48] |
| <i>Imbrasia epimethea</i> Drury, 1773              | 1,970 | 2,860 | 8,100  | 7,420 | 4,110     | 14,000    | 4,800 | 1,600 | [10,61] |
| <i>Imbrasia obscura</i> Butler, 1878               | 2,000 | 2,400 | 3,300  | 3,300 | 1,700     | 7,300     | 2,900 | 1,000 | [62]    |
| <u>Notodontidae</u>                                |       |       |        |       |           |           |       |       |         |
| <i>Anaphe venata</i> Butler, 1878                  | 0,780 | 2,140 | 1,310  | 0,880 | N/A       | 4,640     | 0,380 | 0,000 | [10,63] |
| <b>Orthoptera</b>                                  |       |       |        |       |           |           |       |       |         |
| <u>Gryllidae</u>                                   |       |       |        |       |           |           |       |       |         |
| <i>Acheta domesticus</i> (Linnaeus, 1758) (nymphs) | 2,570 | 4,060 | 7,260  | 6,230 | 2,450     | 9,490     | 3,890 | 0,630 | [10,64] |
| <i>A. domesticus</i> (adults)                      | 2,340 | 4,590 | 10,000 | 5,370 | 2,290     | 8,050     | 3,610 | 0,630 | [10,64] |
| <i>A. domesticus</i> (larvae)                      | 2,100 | 4,200 | 7,300  | 5,600 | 3,600     | 7,400     | 3,500 | 0,600 | [10,65] |
| <i>Gryllodes sigillatus</i> (Walker, 1869)         | 1,720 | 2,660 | 5,780  | 3,840 | 2,700     | 5,380     | 3,680 | N/A   | [66]    |
| <i>Gryllus bimaculatus</i> De Geer, 1773           | 2,500 | 2,160 | 3,970  | 2,420 | 5,370     | 4,560     | 2,000 | N/A   | [67]    |
| <i>Gryllus assimilis</i> (Fabricius, 1775)         | 2,520 | 3,360 | 6,620  | 5,290 | 3,430     | 7,600     | 3,090 | 2,530 | [43]    |
| <u>Acrididae</u>                                   |       |       |        |       |           |           |       |       |         |
| <i>Schistocerca gregaria</i> (Forskål, 1775)       | 2,060 | 2,820 | 7,770  | 3,510 | 1,180     | 5,180     | 3,550 | N/A   | [66]    |

**Table S2.** EAA profiles (mg/100 g fresh weight) of selected Saturniidae derived from literature

| Insect species            | His | Ile | Leu  | Lys  | Met + Cys | Phe + Tyr | Thr  | Trp | Sources |
|---------------------------|-----|-----|------|------|-----------|-----------|------|-----|---------|
| <i>Imbrasia truncata</i>  | 666 | 809 | 1148 | 1449 | 563       | 3446      | 1036 | 245 | [68]    |
| <i>Imbrasia epimethea</i> | 685 | 865 | 1250 | 1479 | 575       | 2938      | 1207 | 266 | [68]    |
